# Supplementary material
Source: Research Square preprint supplement (doi:10.21203/rs.3.rs-9372266/v1)
Supplement: Supplementary file 1 [file 7056605ccd504dc94c88f7d6.pdf]

# Online Appendix 1: GLEES Implementation Details

This online appendix documents the implementation of the GLEES (GPT-Language-based Experimental Economics System) framework (Chen & Wu, 2025) for the attention-driven retail trading experiment. The implementation follows GLEES's four-component prompt architecture and extends the framework to a dynamic, multi-period trading environment with staggered treatment assignment.

## 1. Software Architecture

The experiment is implemented in R (version 4.5.2) using the following core packages:

| Package               | Purpose                                   |
|-----------------------|-------------------------------------------|
| R6                    | Object-oriented Agent and Game classes    |
| data.table            | High-performance data manipulation        |
| jsonlite              | JSON parsing for LLM responses            |
| httr2                 | OpenAI Chat Completions API communication |
| logger                | Audit trail generation                    |
| did                   | Callaway-Sant'Anna estimator              |
| fixest                | Two-way fixed effects estimation          |
| future / future.apply | Parallel processing for agent decisions   |
| cachem / memoise      | Disk-based LLM response caching           |
| digest                | Cache key generation                      |
| pwr                   | A priori power analysis                   |
| ggplot2 / gridExtra   | Visualization                             |
| modelsummary / broom  | Regression output tables                  |

## 2. GLEES Four-Component Prompt Architecture

Following Chen and Wu (2025), each agent interaction consists of four concatenated prompt components:

### 2.1 Component 1: Persona (System Prompt)

Defines stable investor characteristics assigned at initialization. Six distinct personas are implemented:

SocialMomentum: "You are a Robinhood user who trades based on social signals and crowd behavior. You pay close attention to what other retail traders are buying. You experience FOMO."

LotterySeeker: "You treat trading like buying lottery tickets; you chase volatile meme stocks like AMC and GME."

PassiveFollower: "You prefer familiar large-cap names and hold positions rather than trade frequently."

SkepticalContrarian: "You fade social media hype and avoid viral stocks, preferring moderate attention names."

TechnicalTrader: "You are an active trader focused on price momentum and chart patterns."

DividendSeeker: "You only trade stable blue-chip companies like AAPL and NVDA; you avoid AMC and GME."

All personas are passed to the OpenAI Chat Completions API as system messages and carry a sensitivity level (high/medium/low) that influences persona-specific behavior modifications.

### 2.2 Component 2: Game Instructions (User Prompt Section 1)

Provides invariant rules of the trading environment, constructed at experiment initialization. The implementation supports multiple attention specification modes:

- **Original:** Asymmetric constraint—agents must research (DEEP or QUICK) to buy, but can sell any position

- **Specification A:** Symmetric constraint—attention required for both buying AND selling
- **Specification B:** No restrictions—attention allocation tracked but does not constrain trading
- **Specification C:** Search cost model—ignoring research increases transaction costs (50 bps penalty for ignore, 10 bps for quick, 0 for deep)

### 2.3 Component 3: History (User Prompt Section 2)

Implements salience-weighted episodic memory following GLEES specifications with a recency weighting parameter of  $\lambda=0.3$  and payoff-magnitude weighting. The history writer function (salience\_history\_writer) retrieves  $K=3$  most recent salient events with performance indicators:

```
"💰 Portfolio: $10,488 (+4.9%). Recent: [t=60] buy AMC → -$310.00 | [t=61] hold → $0.00 | [t=62] sell AMC → +$22.50"
```

### 2.4 Component 4: Stage Instructions (User Prompt Section 3)

Dynamically generated for each of three stages per period via dedicated R6 Stage classes:

#### Stage 1: Attention Allocation (StageAttentionAllocation)

Agents receive a social leaderboard showing stock activity levels with emoji indicators (🏆 for leader, 🔥 for viral). The prompt requires JSON output with a manipulation check:

```
{
  "manipulation_check": {
    "reasoning": "I see [TICKER] has the 🏆 flag...",
    "highest_buzz_stock": "TICKER",
    "confidence": 10
  },
  "allocation": {"AAPL": "deep/quick/ignore", ...}
}
```

#### Stage 2: Information Revelation (StageInformationRevelation)

Based on attention allocation, constructs individualized information panels with momentum signals, fundamental data, and news sentiment. Deep research includes full signal strength classification (noise/weak/medium/strong).

#### Stage 3: Trading Decision (StageTradingDecision)

Agents receive their portfolio state, researched stock signals, and persona-specific guidance reinforcement. The trading decision uses a more capable model ("System 2" thinking):

```
{"action": "buy"|"sell"|"hold", "ticker": "AAPL"|"NVDA"|"AMC"|"GME"|null,
  "shares": integer, "rationale": string}
```

## 3. LLM Configuration and Dual-Model Architecture

The experiment implements a dual-model "System 1 / System 2" architecture using OpenAI's Chat Completions API:

```
CONFIG$llm <- list(
  model      = "gpt-4o-mini", # Fast model (attention/info stages)
  trading_model = "gpt-4.1-mini", # Slow model (trading decisions)
  endpoint    = "chat/completions",
  max_output_tokens = 2048,
  temperature = 0.4,
```

```

    use_json_mode = TRUE      # Enforces structured JSON output
)

```

The LLMClient R6 class (lines 717-823) manages API communication with built-in retry logic, disk caching, and automatic JSON mode routing for prompts expecting structured output. All API calls are logged with timestamp, full prompt, raw response, token usage, and latency.

## 4. Agent and Game Engine Implementation

Agents are implemented as R6 objects (Agent class) maintaining persistent state including cash, portfolio positions, attention budget, and episodic memory. The Game class orchestrates multi-period execution:

```

Game$new(
  name = "AttentionShockTrading",
  rules = game_rules,
  stages = list(
    StageAttentionAllocation$new(),
    StageInformationRevelation$new(),
    StageTradingDecision$new()
  ),
  agents = agents,      # 96 agent instances
  matching = matching_func, # Treatment-aware context generator
  periods = 252,
  seed = 42
)

```

## 5. Experimental Design and Treatment Assignment

The experiment uses a staggered difference-in-differences design with three cohorts:

- **Cohort 1:** 32 agents, treatment begins at  $t = 60$
- **Cohort 2:** 32 agents, treatment begins at  $t = 120$
- **Cohort 3:** 32 agents, never treated (pure control)

Assignment is balanced across personas using stratified randomization, ensuring each cohort contains approximately equal representation of all six investor types. The treatment assignment is generated via `create_balanced_assignment()` (lines 2730-2790).

## 6. Price Path Simulation

Asset prices follow geometric Brownian motion with calibrated volatilities:

| Ticker | Initial Price | Daily Vol | Annualized Vol |
|--------|---------------|-----------|----------------|
| AAPL   | \$150         | 2.5%      | ~40%           |
| NVDA   | \$450         | 4.5%      | ~71%           |
| AMC    | \$12          | 8.0%      | ~127%          |
| GME    | \$25          | 9.0%      | ~143%          |

A common drift of 0.03% per period is applied across all assets. The `simulate_price_paths()` function generates these paths with regime-switching volatility capability.

## 7. Attention Shock Treatment

The treatment consists of a viral attention shock to meme stocks (AMC, GME). Treatment and control parameters:

| Metric         | Control (Pre-treatment) | Treatment (Post-shock) |
|----------------|-------------------------|------------------------|
| Mentions       | 150-500                 | 45,000-60,000          |
| Robinhood Rank | 45-67                   | 1                      |
| Retail Buyers  | 380-450                 | 90,000-120,000         |
| Buzz Level     | "low"                   | "viral"                |

This represents a 90-400x increase in social metrics for treated agents. Blue-chip stocks (AAPL, NVDA) maintain moderate baseline attention (800-1,200 mentions, rank 8-15) throughout, providing within-period controls. The implementation also supports dose-response experiments with configurable intensity levels.

## 8. Manipulation Checks

Embedded in Stage 1 attention allocation via the `manipulation_check` field in the JSON response. Agents must identify the highest-buzz stock and confidence level. The actual `highest_buzz` is computed from social signal data, and `manipulation_check_passed` is logged as a binary indicator.

## 9. JSON Parsing and Repair Mechanisms

The implementation includes robust JSON handling with automatic repair:

1. **clean\_json\_response():** Strips markdown code fences and whitespace
2. **extract\_first\_json\_object():** Extracts balanced JSON object using brace counting
3. **Repair fallback:** On parse failure, a repair prompt is sent to the LLM with context to regenerate valid JSON
4. **Persona-specific defaults:** If repair fails, persona-appropriate fallback allocations are applied

All parse attempts are logged with `json_fallback_used` and `parse_repaired` indicators for subsequent sensitivity analysis.

## 10. Momentum and Signal Calculation

Price momentum is calculated with Bayesian shrinkage to handle early-period data sparsity:

```
calculate_momentum_with_shrinkage <- function(price_history, volatility_prior, target_periods = 5) {
  shrinkage_weight <- available_periods / (available_periods + target_periods)
  shrunk_momentum <- shrinkage_weight * raw_momentum_per_period
}
```

Signal strength is classified into four categories based on z-score thresholds: noise ( $|z| < 0.10$ ), weak ( $0.10 \leq |z| < 0.25$ ), medium ( $0.25 \leq |z| < 0.50$ ), and strong ( $|z| \geq 0.50$ ).

## 11. Data Collection and Audit Trail

All experimental events are logged to a `data.table` with comprehensive fields including:

- Period (t), agent\_id, stage, specification
- Treatment cohort, is\_treated\_now, post\_treatment indicator
- Attention allocation for each ticker
- Trading action, ticker, shares, price, transaction costs
- Cash, portfolio value, realized P&L
- Manipulation check results
- JSON fallback and intervention flags
- Full rationale text from LLM

Atomic save operations (`write_atomic_csv`, `save_atomic_rds`) ensure data integrity. Output files include `experiment_results_final.csv`, `experiment_results_clean.csv` (excluding intervention-affected observations), and `experiment_full_log.csv`.

## 12. Statistical Analysis Pipeline

The `prepare_clean_sample()` function creates intervention-clean datasets. Two-way fixed effects estimation uses `fixest`:

```
model <- fixest::feols(buy_indicator ~ is_treated_now | agent_id + t,
                      data = clean_trading, cluster = "agent_id")
```

Callaway-Sant'Anna difference-in-differences estimation is available via the `did` package for event study analysis and dynamic treatment effect estimation.

## 13. Reproducibility and Replication Package

Complete replication materials include:

- `Attention_driven_trading_final.R` (3,605 lines, complete implementation)
- `treatment_assignment.csv` (96 agents with cohort assignments)
- `experiment_results_final.csv` / `.rds` (full experimental log)
- `experiment_metadata_corrected.rds` (configuration and feature flags)
- `experiment_audit.log` (API call log with timestamps)
- `power_summary.csv` (a priori power analysis results)

Exact replication requires:

- R version 4.3.0 or higher
- OpenAI API key with GPT-4o-mini and GPT-4.1-mini access
- Total observations: 96 agents × 252 periods × 3 stages = 72,576
- Estimated API cost: ~\$8-12 USD at current rates

## 14. Comparison to GLEES Validation Studies

This implementation extends Chen and Wu (2025) in several dimensions:

| Feature          | GLEES Validation          | This Study                  |
|------------------|---------------------------|-----------------------------|
| Game Type        | Static (ultimatum, trust) | Dynamic portfolio choice    |
| Action Space     | Discrete                  | Continuous (shares)         |
| Periods          | 1-20 rounds               | 252 periods                 |
| Treatment        | Between-subject           | Staggered within-subject    |
| Memory           | Simple history            | Saliency-weighted retrieval |
| LLM Architecture | Single model              | Dual-model (System 1/2)     |

Key technical innovations:

1. **Multi-stage prompting:** Three distinct prompt constructions per period vs. single-stage in GLEES
2. **Dynamic budget constraints:** Attention points and cash constraints create realistic scarcity
3. **Treatment manipulation:** 90-400x algorithmic ranking intervention vs. persona-only manipulations
4. **Path dependence:** Portfolio positions carry forward creating history-dependent contexts
5. **Dual-model architecture:** Different models for automatic vs. deliberative decisions

## 15. Limitations and Extensions

Several GLEES features could not be fully implemented:

- **Agent-agent interactions:** Current implementation uses exogenous GBM price paths. Future extensions could implement order book mechanisms where trades affect prices.

- **Adaptive learning:** While agents maintain memory, they do not explicitly update belief models. Reinforcement learning extensions could allow strategy optimization.
- **Natural language interaction:** Agents make structured JSON decisions. Discussion forums or negotiation could be implemented per GLEES specifications.

## References

Chen, K.-Y., & Wu, Y. D. (2025). GPT-Language-based Experimental Economics System (GLEES). *Working Paper*, University of Texas at Arlington and San Jose State University.

Callaway, B., & Sant'Anna, P. H. (2021). Difference-in-differences with multiple time periods. *Journal of Econometrics*, 225(2), 200-230.

OpenAI. (2024). *OpenAI API Documentation: Chat Completions*.  
<https://platform.openai.com/docs/api-reference/chat>
